# Supplementary material for: A mechanomimetic model of skin fibrosis
Source: Royal Society of Chemistry journal article supplement (doi:10.1039/d5lc00560d), 2025-12-29
Supplement: d5lc00560d9.pdf [file d5lc00560d9.pdf]

## SUPPLEMENTARY FIGURES

### **A mechanomimetic model of skin fibrosis**

Alberto Pappalardo<sup>1</sup>, Deniz Ornek<sup>1,2</sup>, Laura Garriga Cerda<sup>1</sup>, Charlotte Y. Lee<sup>3</sup>, Kristin Myers<sup>3</sup>, Jeffrey W. Kysar<sup>3,4</sup>, Hasan Erbil Abaci<sup>1,3</sup>

<sup>1</sup> Department of Dermatology, Columbia University Irving Medical Center, New York NY

<sup>2</sup> Department of Biomedical Engineering, Columbia University, New York NY

<sup>3</sup> Department of Mechanical Engineering, Columbia University, New York NY

<sup>4</sup> Department of Otolaryngology – Head & Neck Medicine, Columbia University Irving Medical Center, New York NY

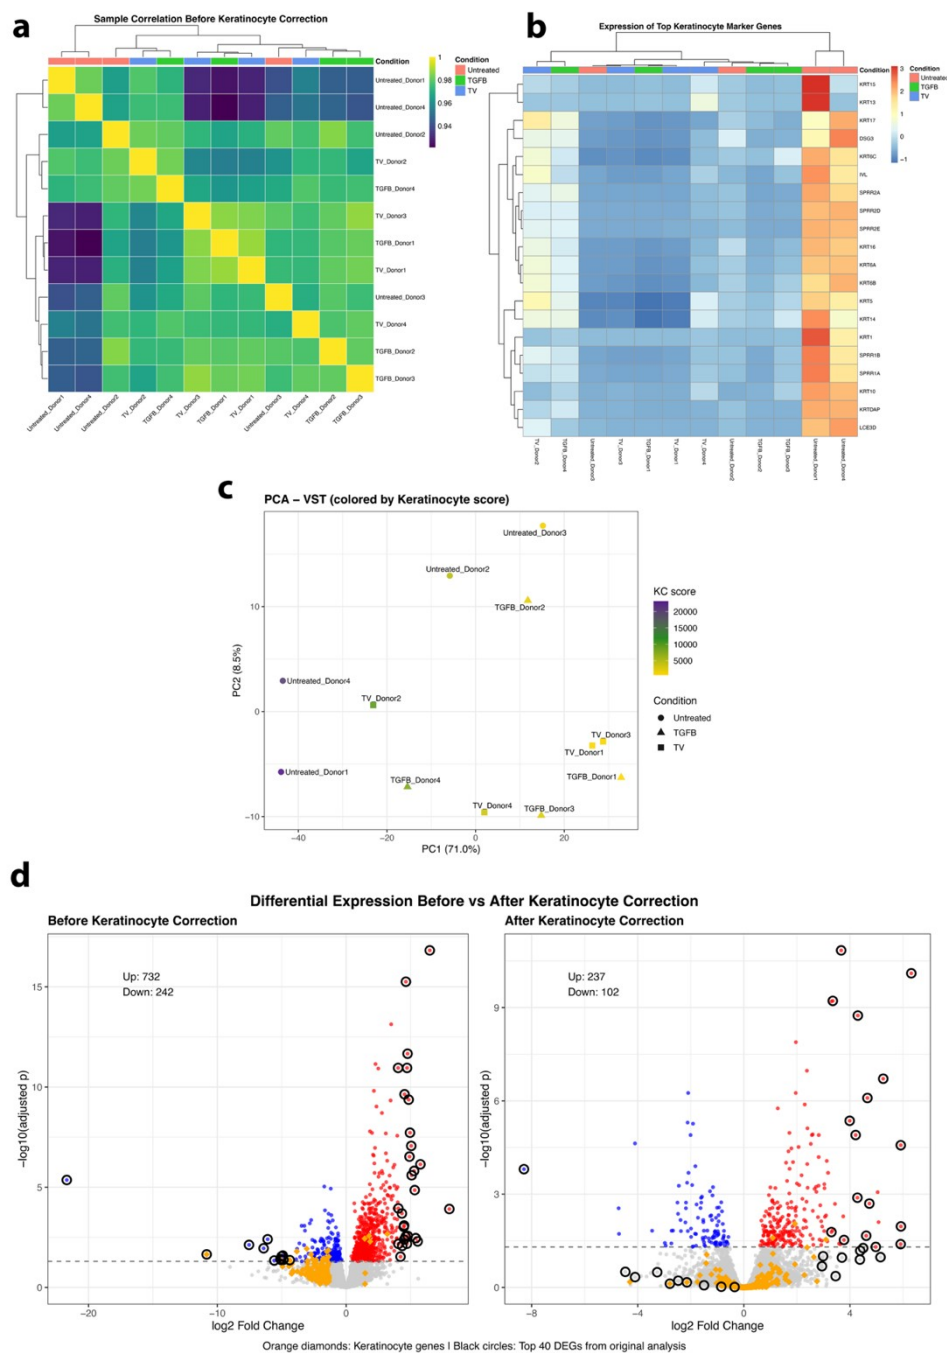

**Supplementary Figure 1. Normalization of signal to exclude KCs.** a) Sample correlation before KCs normalization. b) Principal component analysis indicating the KCs contamination score. c) Heatmap showing the differential expression level of KCs top marker genes across samples. Untreated donors 1 and 4 showed a substantial contamination. d) Volcano plot showing the differential gene expression of untreated control vs TGFb1-treated before and after normalization.

**a**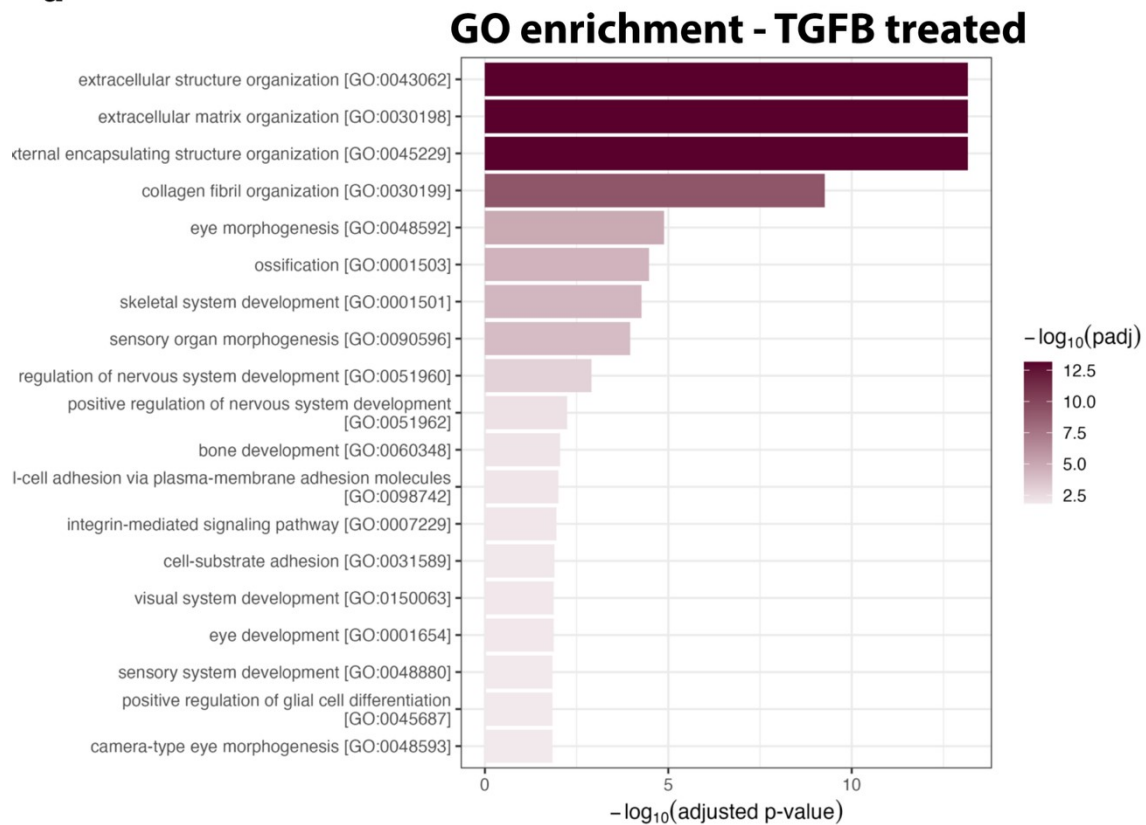**b**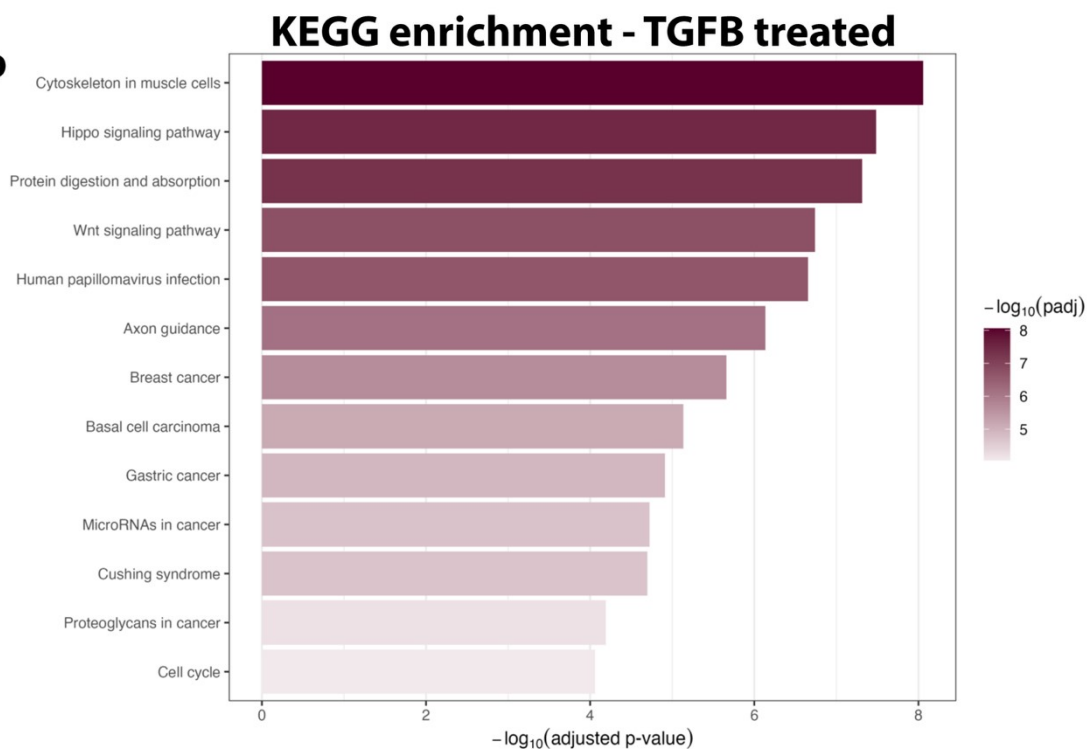

**Supplementary Figure 2. Additional pathway analysis.** GO (a) and KEGG (b) show similar pathway enrichment, mostly associated with extracellular organization, adhesion, collagen metabolism, integrin signaling and organ development.

## TGFB vs TV paired t test

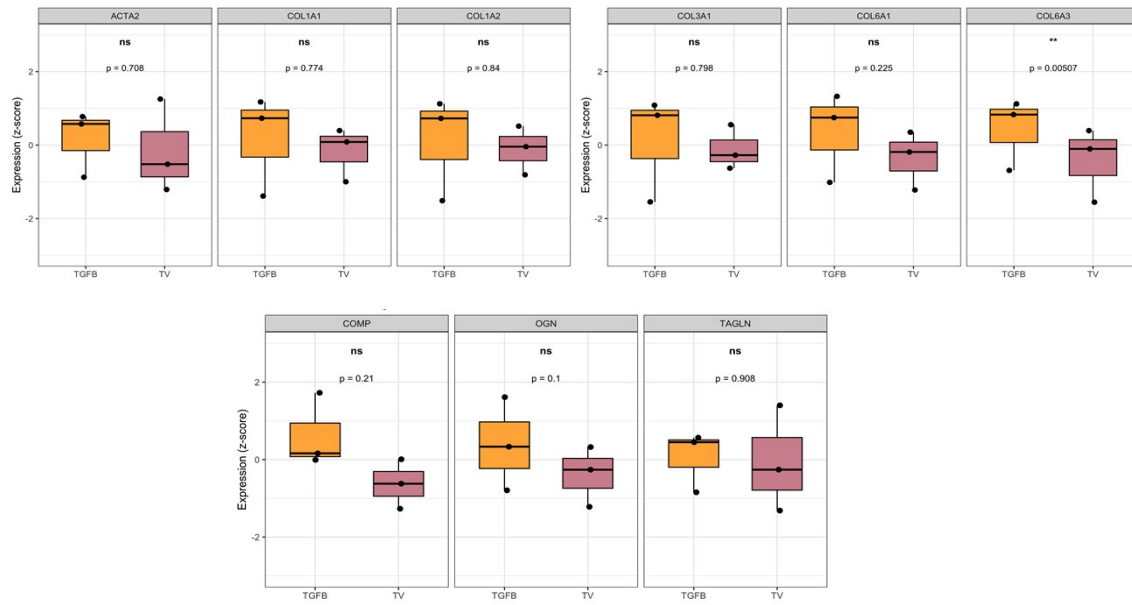

**Supplementary Figure 3.** Paired t-test of fibrosis-associated genes (TGFB vs TV, donors 1, 3, and 4). COL6A3 was significantly downregulated under TV, while other genes showed non-significant downward trends. Donor 2 was excluded due to lack of response to TGFB.

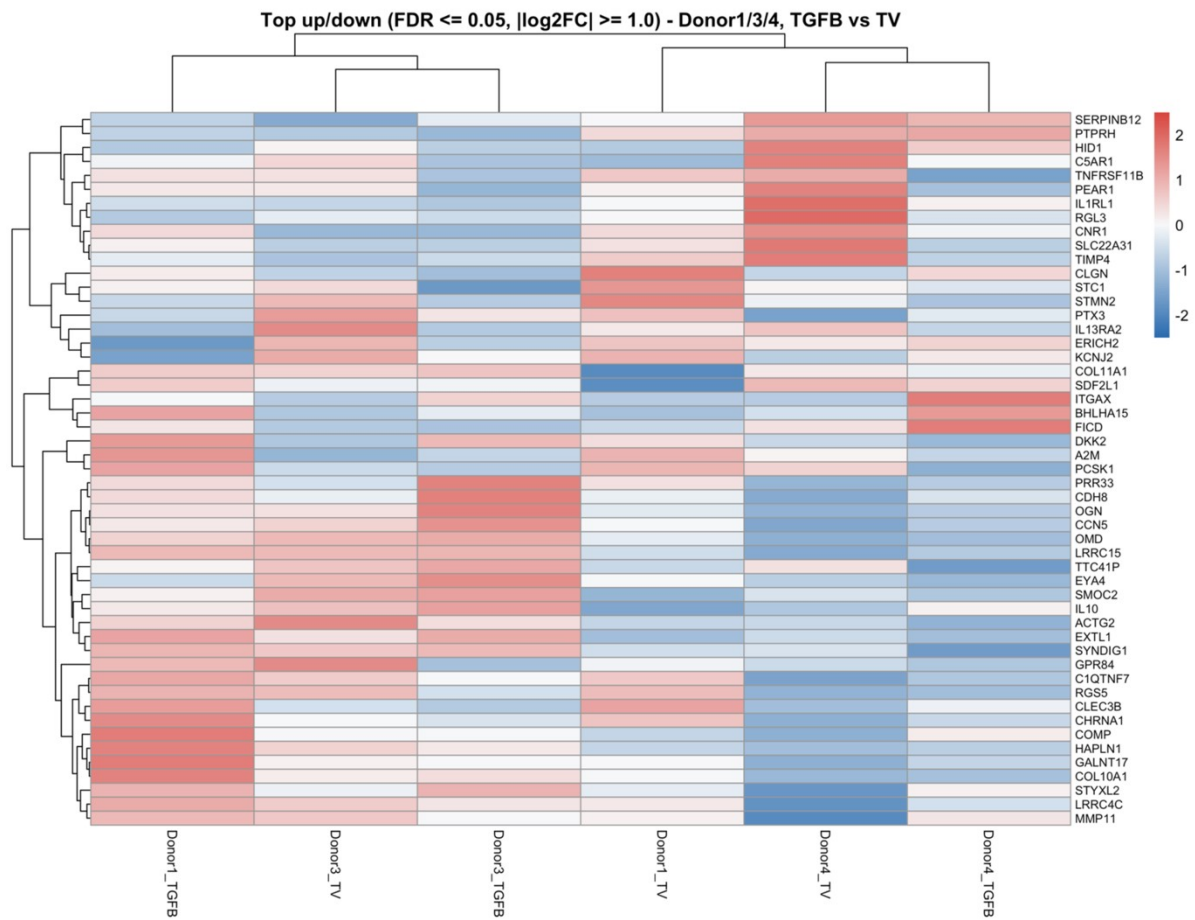

**Supplementary Figure 4. Bulk RNA-sequencing analysis comparing selected TGFB1-treated vs TGFB1+VTP-treated donors.** Heatmap showing differentially expressed fibrosis-associated genes between TGFB and TV (verteporfin) treatment across three donors. The data highlight donor-specific transcriptional responses to TGFB-induced fibrosis and verteporfin treatment.

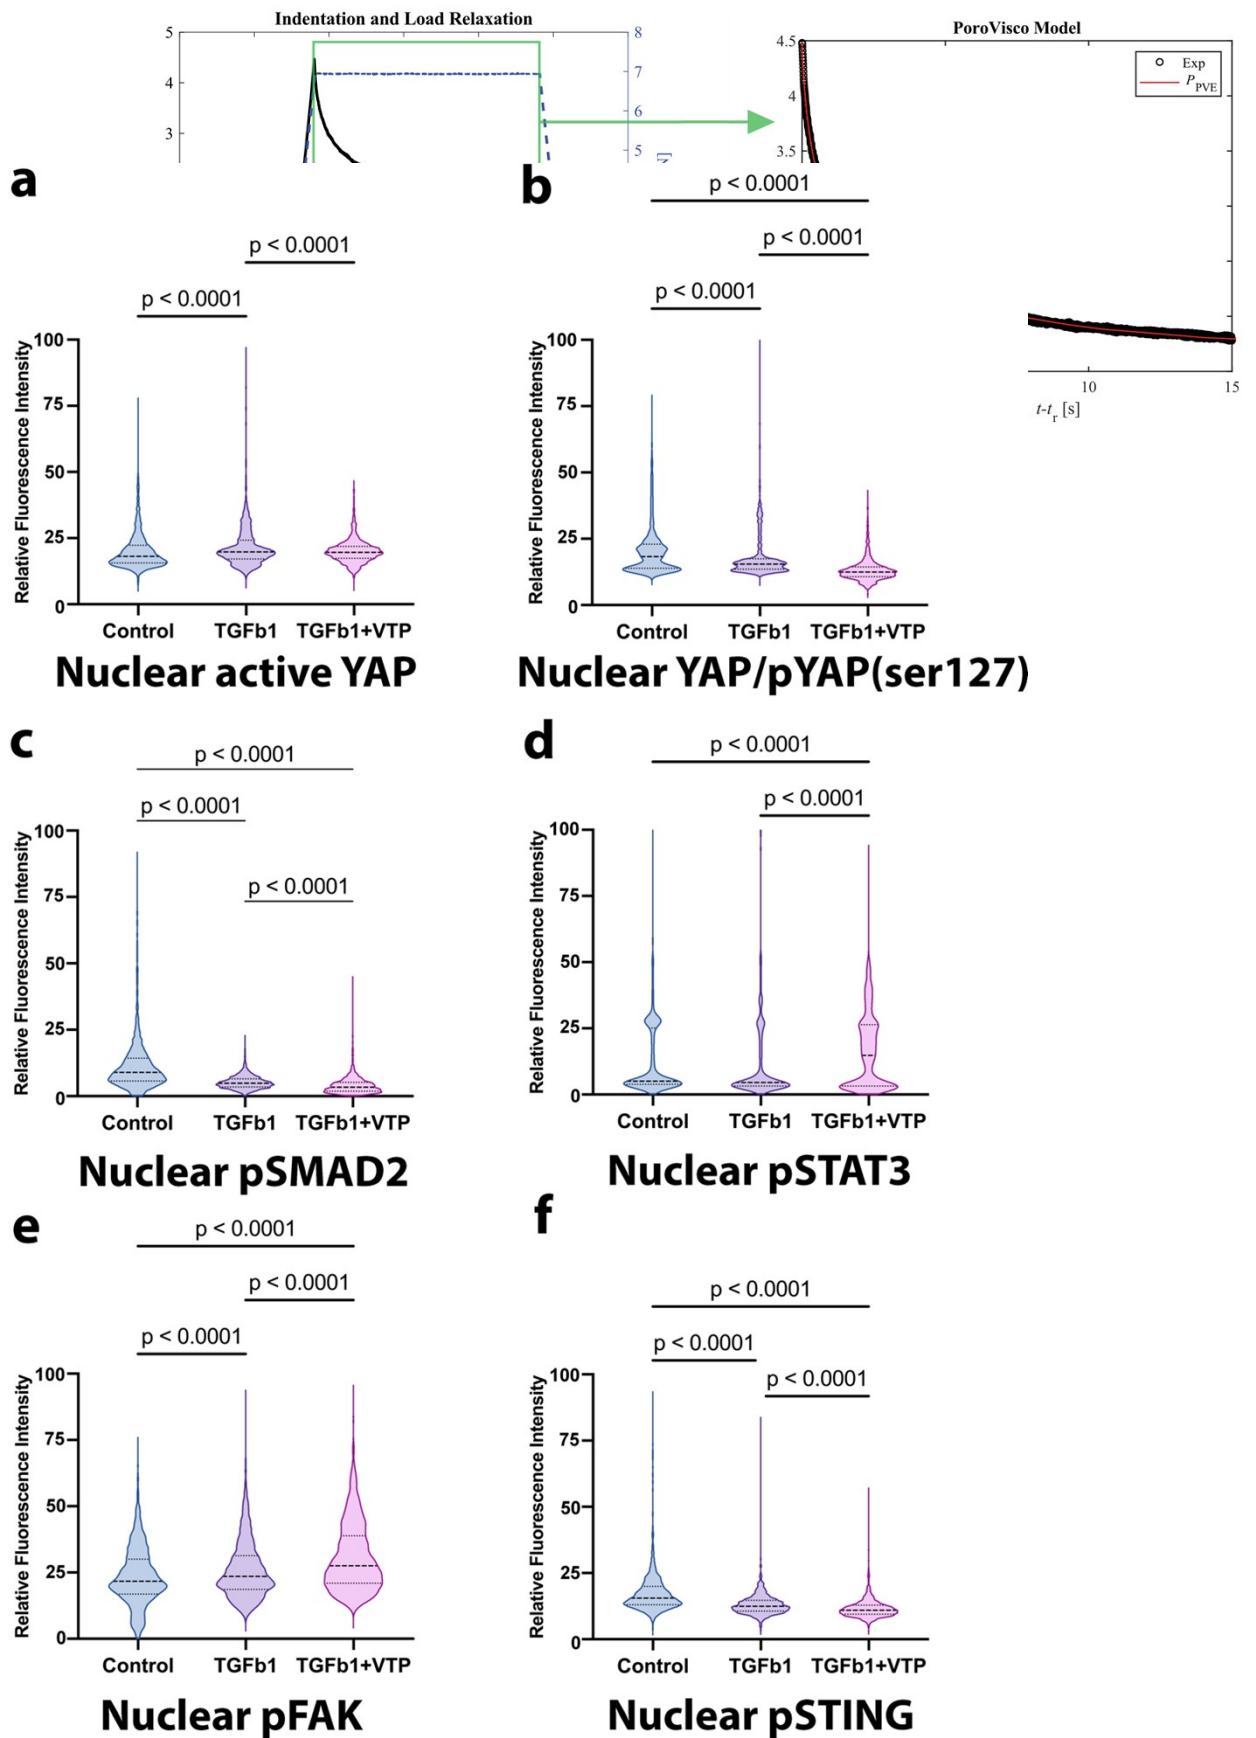

**Supplementary Figure 5. Quantification of mechanosignaling mediators localized in the nucleus.**

IF was used to assess the nuclear localization of YAP, pYAP, pSMAD2, pSTAT3, pFAK, pSTING, and to calculate the YAP/pYAP ratio (**e-j**) ( $n > 1700$  per condition). The statistical analysis was performed using one-way ANOVA.
